# Supplementary material for: To which extent are socio-hydrology studies really integrative? The case of natural hazards and disaster research
Source: Copernicus journal article supplement (doi:10.5194/hess-2021-638), 2021-12-23
Supplement: Supplementary file 1 [file hess-2021-638-supplement.zip]

Supplementary material

Table S1 – Search strategy used to identify relevant socio-hydrology and hydrology articles within the Scopus and Web of Science databases.

| Database               |                | Search terms                                                                                                                                                                                                                                                                                                                                                                                                                       |
|------------------------|----------------|------------------------------------------------------------------------------------------------------------------------------------------------------------------------------------------------------------------------------------------------------------------------------------------------------------------------------------------------------------------------------------------------------------------------------------|
| Socio-hydrology search | Scopus         | (TITLE-ABS ("socio-hydrology" OR "socio-hydrology" OR "socio-hydrological" OR "socio-hydrological" OR "socio-hydrologic" OR "socio-hydrologic") OR AUTHKEY ("socio-hydrology" OR "socio-hydrology" OR "socio-hydrological" OR "socio-hydrological" OR "socio-hydrologic" OR "socio-hydrologic")) AND DOCTYPE (ar) AND (LIMIT-TO (LANGUAGE, "English"))                                                                             |
|                        | Web of Science | (TI=("socio-hydrology" OR "socio-hydrology" OR "socio-hydrological" OR "socio-hydrological" OR "socio-hydrologic" OR "socio-hydrologic")) or (AB=("socio-hydrology" OR "socio-hydrology" OR "socio-hydrological" OR "socio-hydrological" OR "socio-hydrologic" OR "socio-hydrologic"))or (AK=("socio-hydrology" OR "socio-hydrology" OR "socio-hydrological" OR "socio-hydrological" OR "socio-hydrologic" OR "socio-hydrologic")) |
| Hydrology search       | Scopus         | (TITLE-ABS ("hydrology" OR "hydrological" OR "hydrologic") OR AUTHKEY ("hydrology" OR "hydrological" OR "hydrologic")) AND DOCTYPE (ar) AND (LIMIT-TO (LANGUAGE, "English"))                                                                                                                                                                                                                                                       |
|                        | Web of Science | (TI=("hydrology" OR "hydrological" OR "hydrologic")) or (AB=("hydrology" OR "hydrological" OR "hydrologic")) OR (AK=("hydrology" OR "hydrological" OR "hydrologic"))                                                                                                                                                                                                                                                               |

**Table S2: Categories considered for classifying the articles.**

| Category                                                        | Sub-categories                                                                                                                                                                                                                                                                                                                                                                                                                                            | Goal                                                                                                                                                                                                                                                     |
|-----------------------------------------------------------------|-----------------------------------------------------------------------------------------------------------------------------------------------------------------------------------------------------------------------------------------------------------------------------------------------------------------------------------------------------------------------------------------------------------------------------------------------------------|----------------------------------------------------------------------------------------------------------------------------------------------------------------------------------------------------------------------------------------------------------|
| Country of the case study                                       | <ul style="list-style-type: none"> <li>All cited in the articles</li> <li>Not applicable</li> </ul>                                                                                                                                                                                                                                                                                                                                                       | Identify how the studies are distributed across geographic regions (e.g. continents, countries). Not applicable indicates hypothetical studies.                                                                                                          |
| Type of natural hazard investigated                             | <ul style="list-style-type: none"> <li>Flood (Flash flood, Riverine flood, Ponding or pluvial flood, Urban flood, Coastal flood)</li> <li>Wave action</li> <li>Landslide</li> <li>Drought (Hydrological drought, Meteorological drought, Agricultural drought)</li> <li>Wildfire</li> <li>Glacial lake outburst</li> <li>Mass movement</li> <li>Earthquake</li> <li>Volcanic activity</li> <li>Storm</li> <li>Fog</li> <li>Extreme Temperature</li> </ul> | Identify the natural hazards studied. The International Disaster Database (EM-DAT) of the Centre for Research on the Epidemiology of Disaster (CRED) was applied for defining the sub-categories. Biological and extraterrestrial hazards were excluded. |
| Spatial scale of the physical system (a) and social system (b)  | <ul style="list-style-type: none"> <li>Individual/Household (a) (b)</li> <li>Group/Community (a) (b)</li> <li>Municipal (a) (b)</li> <li>River basin (a) (b)</li> <li>Regional (a) (b)</li> <li>National (a) (b)</li> <li>Global (a)</li> <li>International (b)</li> <li>Cross-scale (a) (b)</li> <li>Floodplain (a)</li> <li>Other (a) (b)</li> <li>Undefined** (a) (b)</li> </ul>                                                                       | Identify which spatial scale was considered aiming to uncover similarities and differences between physical and social-spatial scales.                                                                                                                   |
| Temporal scale of the physical system (a) and social system (b) | <ul style="list-style-type: none"> <li>Hour (a) (b)</li> <li>Day (a) (b)</li> <li>Week (a) (b)</li> <li>Month (a) (b)</li> <li>Year (a) (b)</li> <li>Decade (a) (b)</li> <li>Century (a) (b)</li> <li>Event (discrete recurrence) (a)</li> <li>Post-event (b)</li> <li>Other (a) (b)</li> <li>Undefined** (a) (b)</li> </ul>                                                                                                                              | Identify the temporal scale applied for understanding the physical and social systems.                                                                                                                                                                   |

Continued

**Continuation Table S2: Categories considered for classifying the articles.**

| Category                                                                  | Sub-categories                                                                                                                                                                                                                                                                                                                                                                                                                                                                                                                                                                                                                                                                                                     | Goal                                                                                                                                          |
|---------------------------------------------------------------------------|--------------------------------------------------------------------------------------------------------------------------------------------------------------------------------------------------------------------------------------------------------------------------------------------------------------------------------------------------------------------------------------------------------------------------------------------------------------------------------------------------------------------------------------------------------------------------------------------------------------------------------------------------------------------------------------------------------------------|-----------------------------------------------------------------------------------------------------------------------------------------------|
| Physical components                                                       | <ul style="list-style-type: none"> <li>▪ Hydrological</li> <li>▪ Meteorological</li> <li>▪ Hydraulic</li> <li>▪ Topographic</li> <li>▪ Other</li> <li>▪ Not applicable*</li> <li>▪ Undefined**</li> </ul>                                                                                                                                                                                                                                                                                                                                                                                                                                                                                                          | Identify the components used for representing the physical system.                                                                            |
| Social components                                                         | <ul style="list-style-type: none"> <li>▪ Societal memory/Risk awareness/Risk perception</li> <li>▪ Experience of prior event</li> <li>▪ Formal institution (norms, laws, rules)</li> <li>▪ Informal institution (local norms/ rules, attitudes)</li> <li>▪ Individual characteristics</li> <li>▪ Demography (Displacement individual/ population)</li> <li>▪ Economy</li> <li>▪ Other</li> <li>▪ Not applicable*</li> <li>▪ Undefined**</li> </ul>                                                                                                                                                                                                                                                                 | Identify the components used for representing the social system.                                                                              |
| Physical data gathering sources (a) and Social data gathering sources (b) | <ul style="list-style-type: none"> <li>▪ Rainfall gauge (a)</li> <li>▪ Stream gauge (a)</li> <li>▪ Radar (a)</li> <li>▪ Remote sensing (a) (b)</li> <li>▪ Census data (a) (b)</li> <li>▪ Narrative (a) (b)</li> <li>▪ Questionnaire (a) (b)</li> <li>▪ Interview (a) (b)</li> <li>▪ Focus group (a) (b)</li> <li>▪ Participant observation (a) (b)</li> <li>▪ Direct observation (researcher) (a) (b)</li> <li>▪ Social media (a) (b)</li> <li>▪ Newspaper (a) (b)</li> <li>▪ Official document (a) (b)</li> <li>▪ Volunteered Geographic Information (a) (b)</li> <li>▪ Social cartography/ mapping (a) (b)</li> <li>▪ Other (a) (b)</li> <li>▪ Not applicable* (a) (b)</li> <li>▪ Undefined** (a) (b)</li> </ul> | Identify the techniques for data gathering used in the studies. This category contributes to defining the “Methodological approach” category. |

Continued

**Continuation Table S2: Categories considered for classifying the articles.**

| Category                                                    | Sub-categories                                                                                                                                                                                                                                                                                                                                                                                                                                                                                                                                                | Goal                                                                                                                                        |
|-------------------------------------------------------------|---------------------------------------------------------------------------------------------------------------------------------------------------------------------------------------------------------------------------------------------------------------------------------------------------------------------------------------------------------------------------------------------------------------------------------------------------------------------------------------------------------------------------------------------------------------|---------------------------------------------------------------------------------------------------------------------------------------------|
| Physical data processing (a) and Social data processing (b) | <ul style="list-style-type: none"> <li>Agent-based modelling (a) (b)</li> <li>Bayesian networks (a) (b)</li> <li>Behavioural game (a) (b)</li> <li>Cellular automata (a) (b)</li> <li>Comparative analysis (a) (b)</li> <li>Conceptual diagram (a) (b)</li> <li>Content analysis (a) (b)</li> <li>GIS (a) (b)</li> <li>Grounded Theory (a) (b)</li> <li>Mathematical modelling (a) (b)</li> <li>System dynamics (a) (b)</li> <li>Statistical analysis (a) (b)</li> <li>Other (a) (b)</li> <li>Not applicable* (a) (b)</li> <li>Undefined** (a) (b)</li> </ul> | Identify the data processing technique used. This category contributes to defining the “Methodological approach” category.                  |
| Methodological approach                                     | <ul style="list-style-type: none"> <li>Qualitative</li> <li>Quantitative</li> <li>Mixed (Quantitative-Qualitative)</li> </ul>                                                                                                                                                                                                                                                                                                                                                                                                                                 | Identify the approach used considering the data gathering and processing steps.                                                             |
| Interdisciplinarity                                         | <ul style="list-style-type: none"> <li>Mono-disciplinary</li> <li>Weakly Multi or Interdisciplinary</li> <li>Multi or Interdisciplinary</li> </ul>                                                                                                                                                                                                                                                                                                                                                                                                            | Identify the composition of disciplinary perspectives of authors considering their affiliation.                                             |
| Transdisciplinarity                                         | <ul style="list-style-type: none"> <li>There was stakeholder engagement</li> <li>There was not stakeholder engagement</li> </ul>                                                                                                                                                                                                                                                                                                                                                                                                                              | Identify if people were included in the study at some level like invited to fill surveys or to express their views, among other activities. |

\**Not applicable* indicates that the category was not applied in the study.

\*\**Undefined* indicates that the category was not clear.

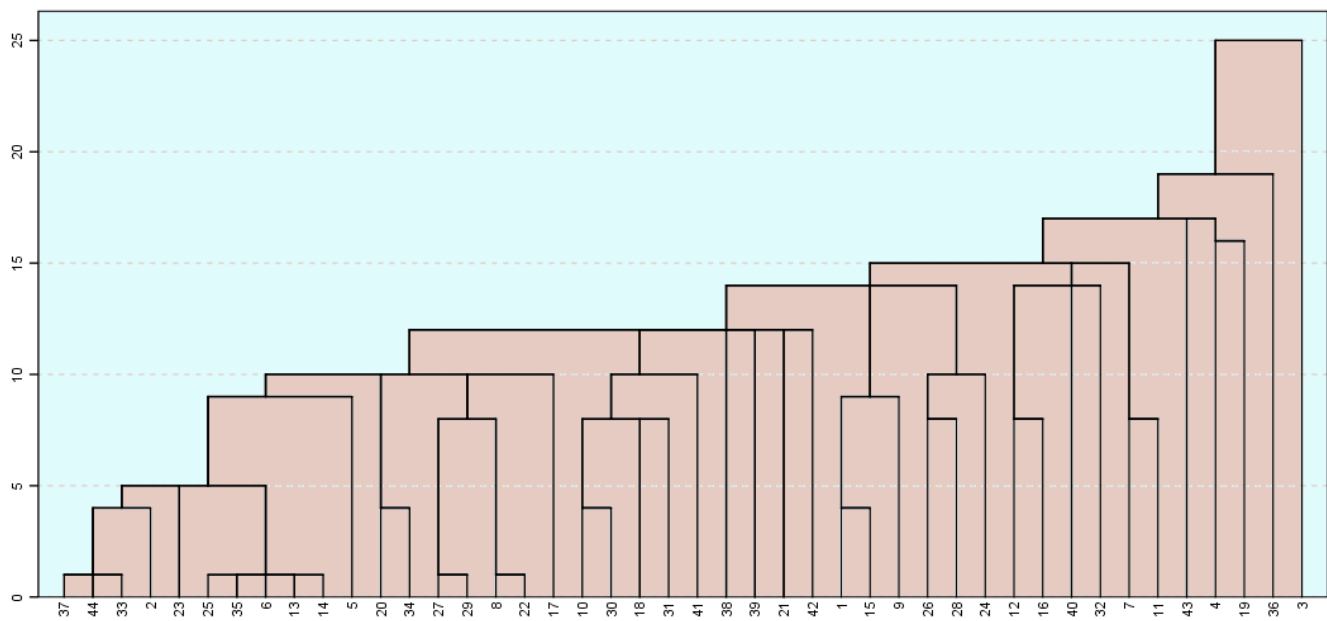

**Supplementary Figure 1: Cluster analysis relating social components, data gathering, and processing tools used. The numbers on the x axis indicate the article number. Categories “Other”, “Undefined”, and “Not applicable” were excluded.**
