# Supplementary material for: To which extent are socio-hydrology studies really integrative? The case of natural hazards and disaster research
Source: Copernicus journal article supplement (doi:10.5194/hess-2021-638), 2021-12-23
Supplement: Supplementary file 2 [file hess-2021-638-supplement.zip]

Archive with 2 entries (2 files):
- Supplementary material-review data.xlsx
- Supplementary material-Table S1 S2 and FigS1.pdf
